# Supplementary material for: Immune-Related RNA-Binding Protein-Based Signature With Predictive and Prognostic Implications in Patients With Lung Adenocarcinoma
Source: PubMed Central journal article supplement (PMC9136055; doi:10.3389/fmolb.2022.807622), 2022-05-13

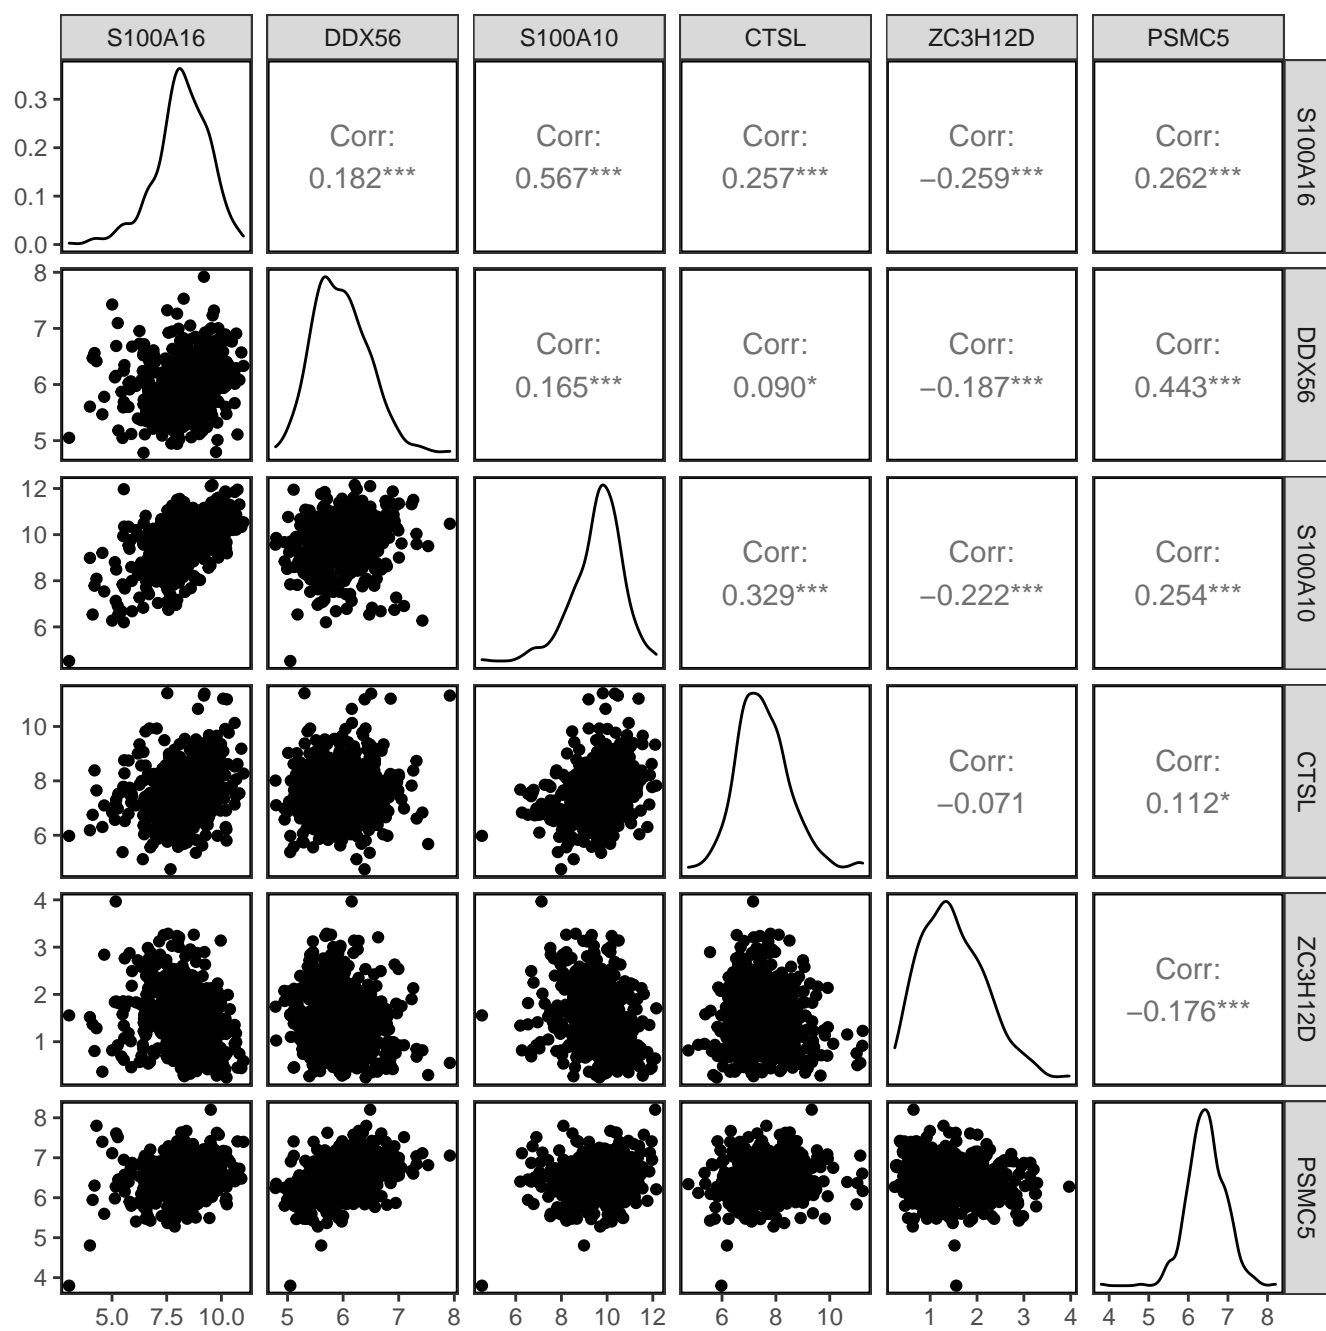

Supplement: Image1.pdf [file Image1.pdf]
